# Supplementary material
Source: publisher figshare collection journal article supplement (https://karger.figshare.com/articles/dataset/_/5124808)
Supplement: Supplementary file 2 [file 1]

Supplementary Table 1. Proportion of concordance of villi indices in more than 2 reviewers

| Total   | Type of disease |           |           |
|---------|-----------------|-----------|-----------|
| (n=83)  | HC (n=23)       | CD (n=17) | UC (n=43) |
| 71 (86) | 20 (87)         | 16 (94)   | 35 (81)   |

Data are n (%).
